# Supplementary material
Source: PubMed Central journal article supplement (PMC5685669)

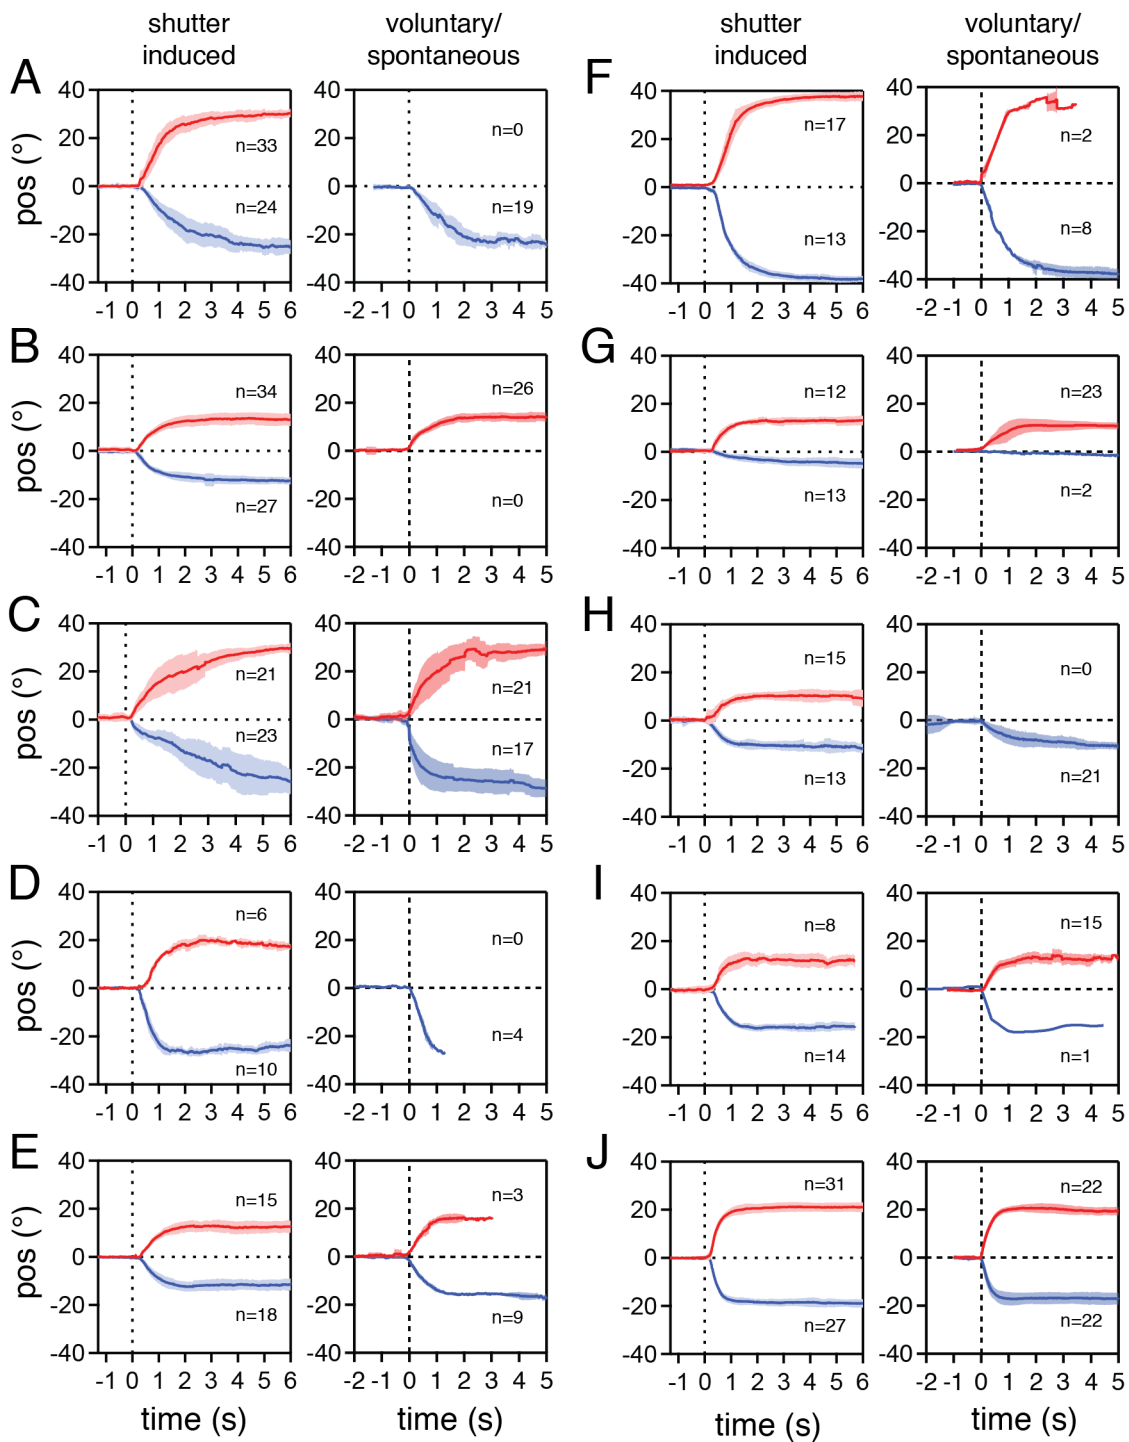

Supplement: NIHMS918355-supplement-Sup__Fig__1.pdf [file NIHMS918355-supplement-Sup__Fig__1.pdf]

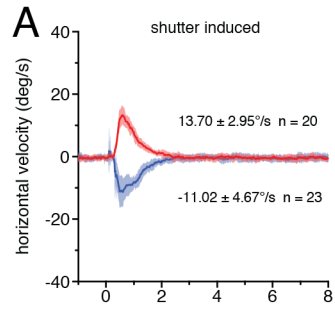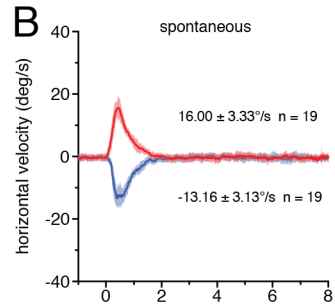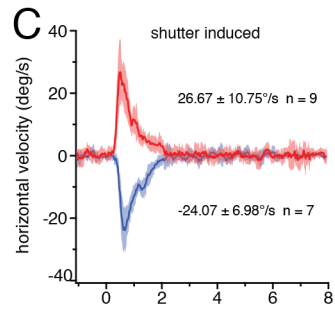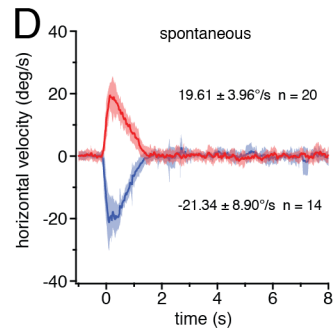

Supplement: NIHMS918355-supplement-Sup__Fig__2.pdf [file NIHMS918355-supplement-Sup__Fig__2.pdf]
